# Supplementary material
Source: PubMed Central journal article supplement (PMC4625916)
Supplement: NIHMS318944-supplement-2.pdf [file NIHMS318944-supplement-2.pdf]

## **Supplemental Figure 1.**

To control for possible effects of doxycycline exposure, control (A-E) and dnTCF4 (dn4; F-J) cells were grown in doxycycline during the entire 6 day culture period (4 days as EB, followed by an additional 2 days in adherent culture). In these conditions, there was little difference in gene expression between control cells and dn4 cells. These data are strikingly similar to the results of culture of control cells without doxycycline (Figure 5A), suggesting that doxycycline exposure itself did not affect lineage differentiation.
